# Supplementary material for: Pichia pastoris Aft1 - a novel transcription factor, enhancing recombinant protein secretion
Source: PubMed Central journal article supplement (PMC4161868; doi:10.1186/s12934-014-0120-5), 2014-09-03
Supplement: 12934_2014_120_MOESM2_ESM.pdf [file 12934_2014_120_MOESM2_ESM.pdf]

```

PpAft1 -----MSLIPEKKLFDDKLLIKPWLQSQLIVKGINIV 32
Hp04658 MGYQFEPVANMKSSPSHSPCRSDGNSSEPLILDKKYFDDKQSIKPWLHSQLVSKGINIV 60
      . ** : ** * ** * * : ** : * * * * *

PpAft1 IERSDDSKIVFKCKNSGVCCTDEDHVHFAIKQRKRANRVKGLSVSEKEDNERFISSEKKK 92
Hp04658 IERSDDTKIVFKCKNS-----HSFAPSAHSAKVNKLSKSLTKDAG----- 100
      * * * * * : * * * * * . : : * * * * * . : *

PpAft1 LKDLRKKHNCFFRIRANFSLRSKKWSIVVNDENHHPYPIIDAKEIGRRNS-----EK 146
Hp04658 ---KRQKGNCFRIRANYSLRAKKWSIVVNDQHNHALYPSGSSQADS DTRSGVGSVQK 157
      * : * * * * * : * * * * * : * * * * * * * * * * . : : . * : *

PpAft1 DIGHHHLPQHTDDRDFQQTQQQQQQQHNTSSSSSSTPFPDKPYQSYLALPSISK 206
Hp04658 PALTAPLINKRPTFGPTNTLLMAAQNTANTQLQPMKFKQLPLPLNFGHVQQTVPVQAGSDSL 217
      * : : . : * : : . . . * * : * * *

PpAft1 EASNISSPLNNNTSNNNNSTMANNTNTADLNI SNIQRINNLQLELNLLIQLNNSNYS 266
Hp04658 STSKSSSSSSPKLSFAEGANSAVKDAKAGQSTPQQQRLSVLHIEINNLLHLNTS--- 274
      . : * * . . : * . . : . : : : . . : * * . * : * : * * * : * * *

PpAft1 LLNSSTKLSHKEDIYKLKILKDSLMQESLN-YSYTVSTSP-----GVGSGAT 314
Hp04658 ---SGLSDANKEETYFKIISTLKD TLKQAPHTYSPTSGTNSPSHTLSHNTLFNYTTNNA 331
      * . . : * * : * * : * * * * * * * : : * * * . * . . . . : :

PpAft1 PTNQNNILLPSLQPIRSTSNQSYNSSSAPQNHIFSNIAGTHDNAFMKF 363
Hp04658 PGSSEKIMLPSISNTLHGSLQSIRTANGAG--AVGVNAGGSYSQYYL-- 376
      * . . : * * * * . * * * . : : . . . * * : : : : :

```
