# Supplementary material for: Pichia pastoris Aft1 - a novel transcription factor, enhancing recombinant protein secretion
Source: PubMed Central journal article supplement (PMC4161868; doi:10.1186/s12934-014-0120-5), 2014-09-03
Supplement: 12934_2014_120_MOESM4_ESM.pdf [file 12934_2014_120_MOESM4_ESM.pdf]

**Additional File 4.** Primers for split marker (sub)fragments (Primers 1-8) for the knock out of Aft as well as the primer pair for verification of positive knock outs (Primers 9-10), which binds outside the split marker cassette on genomic DNA.

| Primer |          | sequence                                    | TM [°C] | sub-fragment | split marker fragment | split marker fragment size [bp] |
|--------|----------|---------------------------------------------|---------|--------------|-----------------------|---------------------------------|
| 1      | A_fw     | TGCATAAGAACACATCAAACACACG                   | 68      | A            | AB                    | 2424                            |
| 2      | A_bw     | GTTGTCGACCTGCAGCGTACGTGTCAAGCAATCGGGGTG     | 67      |              |                       |                                 |
| 3      | B_fw     | CACCCCGATTGCTTGACACGTACGCTGCAGGTCGACAAC     | 66      | B            |                       |                                 |
| 4      | B_bw     | CGGTGAGAATGGCAAAAGCTTATG                    | 70      |              |                       |                                 |
| 5      | C_fw     | AAGCCCGATGCGCCAGAGTTG                       | 68      | C            | CD                    | 2360                            |
| 6      | C_bw     | CCGTATCCTAAATGGGCAGTTGTAGTGGATCTGATATCACCTA | 54      |              |                       |                                 |
| 7      | D_fw     | TAGGTGATATCAGATCCACTACAACGCCCATTAGGATACGG   | 67      | D            |                       |                                 |
| 8      | D_bw     | GGATGAGGATGACGACGATG                        | 66      |              |                       |                                 |
| 9      | Check_fw | GCCACCTGTTTTGAGACTGTAG                      | 66      |              |                       |                                 |
| 10     | Check_bw | TGATTTATTTTTGTGATTTGGACGAAG                 | 68      |              |                       |                                 |
