# Supplementary material for: Pichia pastoris Aft1 - a novel transcription factor, enhancing recombinant protein secretion
Source: PubMed Central journal article supplement (PMC4161868; doi:10.1186/s12934-014-0120-5), 2014-09-03
Supplement: 12934_2014_120_MOESM5_ESM.pdf [file 12934_2014_120_MOESM5_ESM.pdf]

| Primer |      | Sequence                                        | T <sub>M</sub><br>[°C] | Sub-<br>fragment | Split marker<br>fragment | Split marker<br>fragment size [bp] |
|--------|------|-------------------------------------------------|------------------------|------------------|--------------------------|------------------------------------|
| 1      | A_fw | TGCATAAGAACACATCAAACACACG                       | 67.9                   | A                | AB                       | 2424                               |
| 2      | A_bw | GTTGTCGACCTGCAGCGTACGTGTCAAGCAATC<br>GGGGTG     | 67.03                  |                  |                          |                                    |
| 3      | B_fw | CACCCCGATTGCTTGACACGTACGCTGCAGGTC<br>GACAAC     | 66.24                  | B                |                          |                                    |
| 4      | B_bw | CGGTGAGAATGGCAAAGCTTATG                         | 70                     |                  |                          |                                    |
| 5      | C_fw | AAGCCCGATGCGCCAGAGTTG                           | 68                     | C                | CD                       | 2360                               |
| 6      | C_bw | CCGTATCCTAAATGGGCAGTTGTAGTGGATCTG<br>ATATCACCTA | 54                     |                  |                          |                                    |
| 7      | D_fw | TAGGTGATATCAGATCCACTACAACCTGCCATTT<br>AGGATACGG | 66.92                  | D                |                          |                                    |
| 8      | D_bw | GGATGAGGATGACGACGATG                            | 66.01                  |                  |                          |                                    |
